# Supplementary material for: Trilaciclib Prior to Chemotherapy in Patients with Metastatic Triple-Negative Breast Cancer: Final Efficacy and Subgroup Analysis from a Randomized Phase II Study
Source: PubMed Central journal article supplement — Clin Cancer Res. 2021 Dec 6;28(4):629–36. doi: 10.1158/1078-0432.CCR-21-2272 (PMC9377748; doi:10.1158/1078-0432.ccr-21-2272), 2021-12-06
Supplement: ccr-21-2272_supplementary_data_supp1.pdf [file ccr-21-2272_supplementary_data_supp1.pdf]

## SUPPLEMENTARY MATERIAL

**Supplementary Table S1. Characterization of CDK4/6 dependency according to signature**

| <b>Signature</b> | <b>Known dependence</b> | <b>Known independence</b> | <b>Indeterminate dependence</b>         |
|------------------|-------------------------|---------------------------|-----------------------------------------|
| PAM50            | –                       | Basal-like                | HER2-enriched, normal-like, luminal A/B |
| Lehmann          | LAR                     | –                         | Basal-like 1/2, mesenchymal             |

CDK, cyclin-dependent kinase; HER2, human epidermal growth factor receptor 2; LAR, luminal androgen receptor; PAM50, Prediction Analysis of Microarray 50.

**Supplementary Table S2. Subsequent anticancer therapy in the overall study population**

|                                                               | <b>Group 1</b> | <b>Group 2</b> | <b>Group 3</b> | <b>Groups 2 and 3</b> |
|---------------------------------------------------------------|----------------|----------------|----------------|-----------------------|
| Patients, <i>n</i>                                            | 34             | 33             | 35             | 68                    |
| Any subsequent anticancer therapy, <i>n</i> (%)               | 20 (58.8)      | 20 (60.6)      | 23 (65.7)      | 43 (63.2)             |
| Median subsequent lines of systemic therapy, <i>n</i> (range) | 1 (1–3)        | 1 (1–2)        | 2 (1–5)        | 1 (1–5)               |
| 1                                                             | 11 (32.4)      | 11 (33.3)      | 8 (22.9)       | 19 (27.9)             |
| 2                                                             | 3 (8.8)        | 4 (12.1%)      | 5 (14.3)       | 9 (13.2)              |
| 3                                                             | 2 (5.9)        | 0              | 4 (11.4)       | 4 (5.9)               |
| ≥4                                                            | 0              | 0              | 3 (8.6)        | 3 (4.4)               |
| Pyrimidine analogues, <i>n</i> (%)                            |                |                |                |                       |
| Gemcitabine                                                   | 6 (17.6)       | 5 (15.2)       | 11 (31.4)      | 16 (23.5)             |
| Capecitabine                                                  | 4 (11.8)       | 4 (12.1)       | 8 (22.9)       | 12 (17.6)             |
| Platinum compound (carboplatin), <i>n</i> (%)                 | 5 (14.7)       | 3 (9.1)        | 10 (28.6)      | 13 (19.1)             |
| Taxanes, <i>n</i> (%)                                         |                |                |                |                       |
| Paclitaxel                                                    | 5 (14.7)       | 5 (15.1)       | 5 (14.3)       | 10 (14.7)             |
| Docetaxel                                                     | 2 (5.9)        | 1 (3.0)        | 1 (2.9)        | 2 (2.9)               |

|                                                             |          |          |          |           |
|-------------------------------------------------------------|----------|----------|----------|-----------|
| Anthracyclines and related substances, <i>n</i> (%)         |          |          |          |           |
| Doxorubicin                                                 | 0        | 1 (3.0)  | 3 (8.6)  | 4 (5.9)   |
| Pegylated liposomal doxorubicin hydrochloride               | 0        | 0        | 4 (11.5) | 4 (5.9)   |
| Epirubicin                                                  | 0        | 0        | 1 (2.9)  | 1 (1.5)   |
| Vinca alkaloids and analogues (vinorelbine), <i>n</i> (%)   |          |          |          |           |
|                                                             | 0        | 1 (3.0)  | 5 (14.3) | 6 (8.9)   |
| Nitrogen mustard analogues (cyclophosphamide), <i>n</i> (%) |          |          |          |           |
|                                                             | 0        | 1 (3.0)  | 1 (2.9)  | 2 (2.9)   |
| Monoclonal antibodies, <i>n</i> (%)                         |          |          |          |           |
| Pembrolizumab                                               | 4 (11.8) | 3 (9.1)  | 2 (5.7)  | 5 (7.4)   |
| Atezolizumab                                                | 0        | 1 (3.0)  | 2 (5.7)  | 3 (4.4)   |
| Nivolumab                                                   | 1 (2.9%) | 0        | 1 (2.9)  | 1 (1.5)   |
| Sacituzumab govitecan                                       | 0        | 1 (3.0)  | 1 (2.9)  | 2 (2.9)   |
| Other antineoplastic agents, <i>n</i> (%)                   |          |          |          |           |
| Eribulin                                                    | 7 (20.6) | 5 (15.2) | 6 (17.1) | 11 (16.2) |
| Olaparib                                                    | 1 (2.9)  | 0        | 4 (11.4) | 4 (5.9)   |

|                                              |         |          |          |          |
|----------------------------------------------|---------|----------|----------|----------|
| Alpelisib                                    | 0       | 0        | 1 (2.9)  | 1 (1.5)  |
| Other                                        | 1 (2.9) | 0        | 0        | 0        |
| Poly-ADP-ribose polymerase inhibitor         | 0       | 0        | 1 (2.9)  | 1 (1.5)  |
| Etinostat                                    | 0       | 0        | 1 (2.9)  | 1 (1.5)  |
| <hr/>                                        |         |          |          |          |
| Protein kinase inhibitors, <i>n</i> (%)      |         |          |          |          |
| Cediranib                                    | 0       | 0        | 1 (2.9)  | 1 (1.5)  |
| Dabrafenib                                   | 0       | 1 (3.0)  | 0        | 1 (1.5)  |
| Everolimus                                   | 0       | 1 (3.0)  | 0        | 1 (1.5)  |
| Trametinib                                   |         | 1 (3.0)  | 0        | 1 (1.5)  |
| <hr/>                                        |         |          |          |          |
| Aromatase inhibitors, <i>n</i> (%)           |         |          |          |          |
| Anastrozole                                  | 0       | 0        | 1 (2.9)  | 1 (1.5)  |
| Letrozole                                    | 0       | 1 (3.0)  | 0        | 1 (1.5)  |
| <hr/>                                        |         |          |          |          |
| Radiotherapy, <i>n</i> (%)                   | 2 (5.9) | 4 (12.1) | 2 (5.7)  | 6 (8.8)  |
| <hr/>                                        |         |          |          |          |
| Investigational drug, <i>n</i> (%)           | 2 (5.9) | 2 (6.1)  | 5 (14.3) | 7 (10.3) |
| <hr/>                                        |         |          |          |          |
| All other therapeutic products, <i>n</i> (%) | 1 (2.9) | 1 (3.0)  | 1 (2.9)  | 2 (2.9)  |
| <hr/>                                        |         |          |          |          |

Group 1: chemotherapy on days 1 and 8; group 2: trilaciclib and chemotherapy on days 1 and 8; group 3: trilaciclib alone on days 1 and 8 and with chemotherapy on days 2 and 9.

**Supplementary Table S3. Efficacy among patients with CDK4/6-dependent tumors**

|                                | <b>Lehmann signature (LAR)</b> |                |                |                       |
|--------------------------------|--------------------------------|----------------|----------------|-----------------------|
|                                | <b>Group 1</b>                 | <b>Group 2</b> | <b>Group 3</b> | <b>Groups 2 and 3</b> |
| Patients, <i>n</i>             | 9                              | 10             | 9              | 19                    |
| ORR, <i>n</i> (%)              | 2 (22.2)                       | 4 (40.0)       | 1 (11.1)       | 5 (26.3)              |
| Median PFS, months<br>(95% CI) | 8.3 (4.8-NR)                   | 11.6 (9.4-NR)  | 5.9 (2.7-NR)   | 9.4 (6.5-NR)          |
| HR (95% CI)                    | –                              | 0.39 (0.1-1.4) | 1.3 (0.4-4.7)  | 0.65 (0.2-1.8)        |
| Median OS, months<br>(95% CI)  | 9.7 (7.5-NR)                   | NR (9.4-NR)    | 15.3 (7.5-NR)  | 15.3 (9.4-NR)         |
| HR (95% CI)                    | –                              | 0.18 (0.0-0.7) | 0.49 (0.2-1.3) | 0.32 (0.1-0.8)        |

Group 1: chemotherapy on days 1 and 8; group 2: trilaciclib and chemotherapy on days 1 and 8; group 3: trilaciclib alone on days 1 and 8 and with chemotherapy on days 2 and 9. HRs are for comparisons between group 2 and group 1, between group 3 and group 1, and between groups 2 and 3 combined and group 1.

CDK, cyclin-dependent kinase; CI, confidence interval; HR, hazard ratio; LAR, luminal androgen receptor; NR, not reached; ORR, objective response rate; OS, overall survival; PFS, progression-free survival.

**Supplementary Table S4. Efficacy among patients with CDK4/6-independent tumors**

|                                | <b>PAM50 signature (basal-like)</b> |                |                |                       |
|--------------------------------|-------------------------------------|----------------|----------------|-----------------------|
|                                | <b>Group 1</b>                      | <b>Group 2</b> | <b>Group 3</b> | <b>Groups 2 and 3</b> |
| Patients, <i>n</i>             | 10                                  | 13             | 16             | 29                    |
| ORR, <i>n</i> (%)              | 3 (30.0)                            | 6 (46.1)       | 9 (56.3)       | 15 (51.7)             |
| Median PFS, months<br>(95% CI) | 5.4 (2.0-NR)                        | 7.9 (6.1-NR)   | 10.9 (6.2-NR)  | 9.7 (6.2-14.0)        |
| HR (95% CI)                    | –                                   | 0.78 (0.3-1.9) | 0.79 (0.3-2.2) | 0.75 (0.3-1.7)        |
| Median OS, months<br>(95% CI)  | 12.8 (6.3-NR)                       | 19.6 (10.2-NR) | 17.8 (12.9-NR) | 19.6 (14.0-NR)        |
| HR (95% CI)                    | –                                   | 0.56 (0.2-1.5) | 0.64 (0.3-1.6) | 0.60 (0.3-1.4)        |

Group 1: chemotherapy on days 1 and 8; group 2: trilaciclib and chemotherapy on days 1 and 8; group 3: trilaciclib alone on days 1 and 8 and with chemotherapy on days 2 and 9. HRs are for comparisons between group 2 and group 1, between group 3 and group 1, and between groups 2 and 3 combined and group 1.

CDK, cyclin-dependent kinase; CI, confidence interval; HR, hazard ratio; NR, not reached; ORR, objective response rate; OS, overall survival;

PAM50, Prediction Analysis of Microarray 50; PFS, progression-free survival.

**Supplementary Table S5. Efficacy among patients with variable/indeterminant CDK4/6 dependence**

|                                | PAM50 signature (non-basal) |                |                |                | Lehmann signature (basal-like 1/2, mesenchymal) |                |                |                |
|--------------------------------|-----------------------------|----------------|----------------|----------------|-------------------------------------------------|----------------|----------------|----------------|
|                                | Group 1                     | Group 2        | Group 3        | Groups 2 and 3 | Group 1                                         | Group 2        | Group 3        | Groups 2 and 3 |
| Patients, <i>n</i>             | 12                          | 10             | 14             | 24             | 13                                              | 16             | 18             | 34             |
| ORR, <i>n</i> (%)              | 4 (33.3)                    | 4 (40.0)       | 5 (35.7)       | 9 (37.5)       | 5 (38.5)                                        | 9 (56.3)       | 10 (55.6)      | 19 (55.9)      |
| Median PFS, months<br>(95% CI) | 8.3 (4.8-NR)                | 11.9 (8.8-NR)  | 7.3 (5.9-NR)   | 9.4 (7.3-NR)   | 5.7 (2.2-NR)                                    | 6.2 (4.3-NR)   | 10.9 (7.3-NR)  | 9.0 (6.2-15.5) |
| HR (95% CI)                    | –                           | 0.42 (0.1-1.3) | 0.71 (0.3-1.9) | 0.57 (0.2-1.3) | –                                               | 0.80 (0.4-1.8) | 0.55 (0.2-1.3) | 0.65 (0.3-1.3) |
| Median OS, months<br>(95% CI)  | 10.1 (7.5-18.8)             | NR (9.4-NR)    | 22.3 (13.1-NR) | 22.3 (13.0-NR) | 16.0 (6.3-NR)                                   | 14.0 (10.2-NR) | 22.3 (15.6-NR) | 19.8 (14.0-NR) |
| HR (95% CI)                    | –                           | 0.30 (0.1-0.8) | 0.32 (0.1-0.8) | 0.33 (0.2-0.7) | –                                               | 0.66 (0.3-1.5) | 0.47 (0.2-1.1) | 0.55 (0.3-1.1) |

Group 1: chemotherapy on days 1 and 8; group 2: trilaciclib and chemotherapy on days 1 and 8; group 3: trilaciclib alone on days 1 and 8 and with chemotherapy on days 2 and 9. HRs are for comparisons between group 2 and group 1, between group 3 and group 1, and between groups 2 and 3 combined and group 1.

CDK, cyclin-dependent kinase; CI, confidence interval; HR, hazard ratio; NR, not reached; ORR, objective response rate; OS, overall survival;

PAM50, Prediction Analysis of Microarray 50; PFS, progression-free survival.



**Supplementary Table S6. Baseline characteristics in patients with PD-L1–positive and PD-L1–negative tumors**

|           | <b>Group 1 (<i>n</i> = 27)</b> |                           | <b>Group 2 (<i>n</i> = 26)</b> |                           | <b>Group 3 (<i>n</i> = 32)</b> |                           | <b>Groups 2 and 3<br/>(<i>n</i> = 58)</b> |                           | <b>Total (<i>N</i> = 85)</b> |                           |
|-----------|--------------------------------|---------------------------|--------------------------------|---------------------------|--------------------------------|---------------------------|-------------------------------------------|---------------------------|------------------------------|---------------------------|
|           | <b>PD-L1<br/>positive</b>      | <b>PD-L1<br/>negative</b> | <b>PD-L1<br/>positive</b>      | <b>PD-L1<br/>negative</b> | <b>PD-L1<br/>positive</b>      | <b>PD-L1<br/>negative</b> | <b>PD-L1<br/>positive</b>                 | <b>PD-L1<br/>negative</b> | <b>PD-L1<br/>positive</b>    | <b>PD-L1<br/>negative</b> |
| Patients  | 17 (63.0)                      | 10 (37.0)                 | 16 (61.5)                      | 10 (38.5)                 | 16 (50.0)                      | 16 (50.0)                 | 32 (55.2)                                 | 26 (44.8)                 | 49 (57.6)                    | 36 (42.4)                 |
| Age       |                                |                           |                                |                           |                                |                           |                                           |                           |                              |                           |
| ≥65 years | 4 (23.5)                       | 3 (30.0)                  | 4 (25.0)                       | 5 (50.0)                  | 6 (37.5)                       | 3 (18.8)                  | 10 (31.2)                                 | 8 (30.7)                  | 14 (28.6)                    | 11 (30.6)                 |
| <65 years | 13 (76.5)                      | 7 (70.0)                  | 12 (75.0)                      | 5 (50.0)                  | 10 (62.5)                      | 13 (81.2)                 | 22 (68.8)                                 | 18 (69.2)                 | 35 (71.4)                    | 25 (69.4)                 |
| Race      |                                |                           |                                |                           |                                |                           |                                           |                           |                              |                           |
| White     | 12 (70.6)                      | 9 (90.0)                  | 13 (81.2)                      | 5 (50.0)                  | 11 (68.8)                      | 14 (87.5)                 | 24 (75.0)                                 | 19 (73.1)                 | 36 (73.5)                    | 28 (77.8)                 |
| Non-White | 5 (29.4)                       | 1 (10.0)                  | 3 (18.8)                       | 5 (50.0)                  | 5 (31.2)                       | 2 (12.4)                  | 8 (25.0)                                  | 7 (26.9)                  | 13 (26.5)                    | 8 (22.2)                  |
| Country   |                                |                           |                                |                           |                                |                           |                                           |                           |                              |                           |
| USA       | 16 (94.1)                      | 7 (70.0)                  | 12 (75.0)                      | 10 (100)                  | 13 (81.2)                      | 13 (81.2)                 | 25 (78.1)                                 | 23 (88.5)                 | 41 (83.7)                    | 30 (83.3)                 |
| Non-USA   | 1 (5.9)                        | 3 (30.0)                  | 4 (24.9)                       | 0                         | 3 (18.6)                       | 3 (18.7)                  | 7 (21.8)                                  | 3 (11.5)                  | 8 (16.3)                     | 6 (16.7)                  |
| ECOG PS   |                                |                           |                                |                           |                                |                           |                                           |                           |                              |                           |
| 0         | 8 (47.1)                       | 3 (30.0)                  | 10 (62.5)                      | 3 (30.0)                  | 11 (68.8)                      | 10 (62.5)                 | 21 (65.6)                                 | 13 (50.0)                 | 29 (59.2)                    | 16 (44.4)                 |
| 1         | 9 (52.9)                       | 7 (70.0)                  | 6 (37.5)                       | 7 (70.0)                  | 5 (31.2)                       | 6 (37.5)                  | 11 (34.4)                                 | 13 (50.0)                 | 20 (40.8)                    | 20 (55.6)                 |

|                                  |           |          |           |          |           |           |           |           |           |           |
|----------------------------------|-----------|----------|-----------|----------|-----------|-----------|-----------|-----------|-----------|-----------|
| TNBC histological classification |           |          |           |          |           |           |           |           |           |           |
| Acquired                         | 2 (11.8)  | 2 (20.0) | 2 (12.5)  | 4 (40.0) | 2 (12.5)  | 8 (50.0)  | 4 (12.5)  | 12 (46.2) | 6 (12.2)  | 14 (38.9) |
| Pure                             | 15 (88.2) | 6 (60.0) | 13 (81.2) | 6 (60.0) | 14 (87.5) | 6 (37.5)  | 27 (84.4) | 12 (46.2) | 42 (85.7) | 18 (50.0) |
| Unknown                          | –         | 2 (20.0) | 1 (6.2)   | –        | –         | 2 (12.5)  | 1 (3.1)   | 2 (7.7)   | 1 (2.0)   | 4 (11.1)  |
| Liver involvement                |           |          |           |          |           |           |           |           |           |           |
| Yes                              | 4 (23.5)  | 3 (30.0) | 5 (31.2)  | 3 (30.0) | 4 (25.0)  | 5 (31.2)  | 9 (28.1)  | 8 (30.8)  | 13 (26.5) | 11 (30.6) |
| No                               | 13 (76.5) | 7 (70.0) | 11 (86.8) | 7 (70.0) | 12 (75.0) | 11 (68.8) | 23 (71.9) | 18 (69.2) | 36 (73.5) | 25 (69.4) |
| Prior lines of chemotherapy      |           |          |           |          |           |           |           |           |           |           |
| 1 or 2                           | 8 (47.1)  | 2 (20.0) | 6 (37.5)  | 2 (20.0) | 10 (62.5) | 4 (25.0)  | 16 (50.0) | 6 (23.1)  | 24 (49.0) | 8 (22.2)  |
| 0                                | 9 (52.9)  | 8 (80.0) | 10 (62.5) | 8 (80.0) | 6 (37.5)  | 12 (75.0) | 16 (50.0) | 20 (76.9) | 25 (51.0) | 28 (77.8) |

Values are presented as *n* (%).

ECOG PS, Eastern Cooperative Oncology Group performance status; PD-L1, programmed death ligand-1; TNBC, triple-negative breast cancer.

**Supplementary Table S7. Tumor response, PFS, and OS according to PD-L1 status**

|                                | PD-L1 positive  |                |                |                | PD-L1 negative |                |                |                |
|--------------------------------|-----------------|----------------|----------------|----------------|----------------|----------------|----------------|----------------|
|                                | Group 1         | Group 2        | Group 3        | Groups 2 and 3 | Group 1        | Group 2        | Group 3        | Groups 2 and 3 |
| Patients analyzed, <i>n</i>    | 17              | 16             | 16             | 32             | 10             | 10             | 16             | 26             |
| ORR, <i>n</i> (%)              | 4 (23.5)        | 8 (50.0)       | 7 (43.8)       | 15 (46.9)      | 3 (30.0)       | 4 (40.0)       | 4 (25.0)       | 8 (30.7)       |
| Median PFS, months<br>(95% CI) | 5.4 (3.3-NR)    | 7.9 (6.1-NR)   | 10.9 (6.2-NR)  | 9.7 (6.2-15.5) | 9.2 (8.3-NR)   | 11.9 (8.8-NR)  | 9.0 (6.4-NR)   | 9.4 (6.5-14.6) |
| HR (95% CI)                    | –               | 0.74 (0.3-1.7) | 0.41 (0.2-1.1) | 0.57 (0.3-1.2) | –              | 0.60 (0.2-1.9) | 1.47 (0.5-4.3) | 0.97 (0.4-2.5) |
| Median OS, months<br>(95% CI)  | 10.5 (6.3-18.8) | 20.1 (10.2-NR) | 32.7 (15.3-NR) | 32.7 (17.7-NR) | 13.9 (12.6-NR) | NR (9.4-NR)    | 17.8 (12.9-NR) | 17.8 (13.1-NR) |
| HR (95% CI)                    | –               | 0.38 (0.2-1.0) | 0.30 (0.1-0.8) | 0.34 (0.2-0.7) | –              | 0.35 (0.1-1.2) | 0.55 (0.2-1.4) | 0.48 (0.2-1.2) |

Group 1: chemotherapy on days 1 and 8; group 2: trilaciclib prior to chemotherapy on days 1 and 8; group 3: trilaciclib alone on days 1 and 8 and prior to chemotherapy on days 2 and 9. HRs are for comparisons between group 2 and group 1, between group 3 and group 1, and between groups 2 and 3 combined and group 1.

CI, confidence interval; HR, hazard ratio; NR, not reached; ORR, objective response rate; OS, overall survival; PD-L1, programmed death ligand-1; PFS, progression-free survival.

**Supplementary Table S8. Tumor response, PFS, and OS according to immune subtypes**

| Subtype                                             | High/class 2  |                |                |                | Low/not class 2 |                |                |                |
|-----------------------------------------------------|---------------|----------------|----------------|----------------|-----------------|----------------|----------------|----------------|
|                                                     | Group 1       | Group 2        | Group 3        | Groups 2 and 3 | Group 1         | Group 2        | Group 3        | Groups 2 and 3 |
| Ayer's IFN $\gamma$ signature, <i>n</i>             | 13            | 11             | 12             | 23             | 9               | 15             | 15             | 30             |
| ORR, <i>n</i> (%)                                   | 5 (38.5)      | 7 (63.6)       | 6 (50.0)       | 13 (56.5)      | 2 (22.2)        | 5 (33.3)       | 6 (40.0)       | 11 (36.7)      |
| Median PFS, months<br>(95% CI)                      | 5.7 (5.4-NR)  | 13.0 (11.3-NR) | 9.0 (6.5-NR)   | 11.3 (7.3-NR)  | 8.3 (2.0-NR)    | 13.9 (3.9-NR)  | 7.9 (6.1-NR)   | 8.8 (6.1-14.6) |
| HR (95% CI)                                         | –             | 0.40 (0.1-1.2) | 0.59 (0.2-1.5) | 0.49 (0.2-1.1) | –               | 0.85 (0.3-2.3) | 0.90 (0.3-2.7) | 0.87 (0.3-2.2) |
| Median OS, months<br>(95% CI)                       | 12.8 (9.7-NR) | 20.1 (7.1-NR)  | 22.3 (17.8-NR) | 22.3 (15.3-NR) | 8.3 (6.3-NR)    | 15.3 (8.7-NR)  | 19.6 (10.2-NR) | 15.6 (12.9-NR) |
| HR (95% CI)                                         | –             | 0.44 (0.2-1.2) | 0.35 (0.1-0.9) | 0.40 (0.2-0.9) | –               | 0.30 (0.1-0.9) | 0.41 (0.2-1.1) | 0.37 (0.2-0.9) |
| Ayer's expanded IFN $\gamma$<br>signature, <i>n</i> | 13            | 10             | 14             | 24             | 9               | 13             | 16             | 29             |
| ORR, <i>n</i> (%)                                   | 5 (38.5)      | 6 (60.0)       | 6 (42.9)       | 12 (50.0)      | 2 (22.2)        | 5 (38.5)       | 7 (43.8)       | 12 (41.4)      |

|                                                  |               |                |                |                 |                 |                |                |                |
|--------------------------------------------------|---------------|----------------|----------------|-----------------|-----------------|----------------|----------------|----------------|
| Median PFS, months<br>(95% CI)                   | 5.7 (4.8-NR)  | 11.3 (8.8-NR)  | 9.0 (6.2-NR)   | 9.7 (7.3-20.1)  | 8.3 (2.0-NR)    | 13.9 (5.9-NR)  | 7.9 (6.1-NR)   | 9.4 (6.1-15.5) |
| HR (95% CI)                                      | –             | 0.39 (0.1-1.2) | 0.56 (0.2-1.5) | 0.47 (0.2-1.1)  | –               | 1.0 (0.4-2.7)  | 1.2 (0.4-3.6)  | 1.1 (0.4-2.7)  |
| Median OS, months<br>(95% CI)                    | 12.8 (9.7-NR) | NR (7.1-NR)    | 19.8 (15.3-NR) | 20.1 (15.3-NR)  | 9.1 (6.3-NR)    | 17.7 (12.9-NR) | 14.0 (10.2-NR) | 15.6 (12.9-NR) |
| HR (95% CI)                                      | –             | 0.38 (0.1-1.0) | 0.44 (0.2-1.1) | 0.41 (0.2-0.9)  | –               | 0.40 (0.1-1.1) | 0.38 (0.1-1.0) | 0.40 (0.2-0.9) |
| Thorsson six-class immune<br>signature, <i>n</i> | 10            | 17             | 18             | 35              | 12              | 9              | 9              | 18             |
| ORR, <i>n</i> (%)                                | 3 (30.0)      | 9 (52.9)       | 8 (44.4)       | 17 (48.6)       | 4 (33.3)        | 3 (33.3)       | 4 (44.4)       | 7 (38.9)       |
| Median PFS, months<br>(95% CI)                   | 9.2 (5.4-NR)  | 8.8 (6.2-NR)   | 10.9 (6.5-NR)  | 10.9 (6.5-14.0) | 5.4 (3.3-NR)    | 7.3 (1.2-NR)   | 9.7 (2.1-NR)   | 9.4 (5.9-15.6) |
| HR (95% CI)                                      | –             | 0.75 (0.3-2.0) | 0.65 (0.2-1.7) | 0.69 (0.3-1.7)  | –               | 0.63 (0.2-1.8) | 0.99 (0.4-2.7) | 0.76 (0.3-1.8) |
| Median OS, months<br>(95% CI)                    | 12.8 (5.8-NR) | NR (13.0-NR)   | 22.3 (15.3-NR) | 32.7 (15.3-NR)  | 10.2 (7.5-18.8) | 13.1 (8.7-NR)  | 14.8 (9.4-NR)  | 13.1 (9.4-NR)  |
| HR (95% CI)                                      | –             | 0.47 (0.2-1.2) | 0.45 (0.2-1.1) | 0.46 (0.2-1.0)  | –               | 0.42 (0.1-1.2) | 0.52 (0.2-1.3) | 0.49 (0.2-1.0) |

Group 1: chemotherapy on days 1 and 8; group 2: trilaciclib prior to chemotherapy on days 1 and 8; group 3: trilaciclib alone on days 1 and 8 and prior to chemotherapy on days 2 and 9. HRs are for comparisons between group 2 and group 1, between group 3 and group 1, and between groups 2 and 3 combined and group 1. Class 2 was defined as IFN $\gamma$  dominant. Not adjusted for multiplicity.

CI, confidence interval; HR, hazard ratio; IFN $\gamma$ , interferon gamma; NR, not reached; ORR, objective response rate; OS, overall survival; PFS, progression-free survival.
